# Supplementary material
Source: MDPI journal article supplement (https://www.mdpi.com/2073-4433/11/4/367)
Supplement: s1 [file s1]

## Sheet: Table S1
	Table S1. Sampling time, volume of sampled air (expressed in m-3), PM10 mass concentration (expressed in µg m-3) from the quartz filters used for the determination of oxidative potential
	responses, ascorbic acid (AA) and dithiothreitol (DTT) oxidative potential responses (OP, expressed in nmol min-1), AA and DTT volume- and mass-normalized oxidative potential (OPV expressed
	in nmol min-1 m-3 and OPm expressed in nmol min-1 µg-1, respectively), PM10 mass concentration (expressed in µg m-3) from the PTFE filters used for the determination of chemical element mass
	concentration, and mass concentration (expressed in µg m-3) of all analyzed metals and Br, P, S, and Se have been reported for winter samples (S1-S10, from January to March 2018) and spring
	samples (S11-S20, from May to June 2018). Main statistical parameters (mean, standard deviation SD, maximum value Max, minimum value Min, 25th and 75th percentiles, and skewness) have
	also been reported for total, winter, and spring period. Note that the mean values of OP-AA and -DTT for the blank filters were 0.29 and 0.59, respectively, that were subtracted from the
	corresponding values for the loaded filters.
	Sample	Date	Sampling time	Volume of sampled air	PM10 (quartz filter)	OP AA	OP DTT	OPVAA	OPVDTT	OPmAA	OPmDTT	PM10 (PTFE filter)	As	Ba	Cd	Cr	Mo	Ni	Pb	V	Al	Si	P	S	K	Ca	Ti	Mn	Fe	Cu	Zn	Se	Br	Rb	Sr	Zr
winter	S1	2018-01-23	72 h	155.455	35.1999	1.918	2.42877	0.164506	0.208315	0.00467349	0.00591807	23	0.000539048	0.010297	0.000224229	0.00321107	0.000688451	0.0017749	0.00728054	0.00148537	0.0572208	0.119121	0.00978497	0.890821	0.54659	0.711584	0.00505988	0.00387514	0.251098	0.0059163	0.0165827	0.000386035	0.00711676	0.00113942	0.00113017	0.00167769
	S2	2018-01-30	72 h	156.328	30.7686	5.0504	2.69757	0.430752	0.230078	0.0139997	0.00747769	26	0.000385014	0.00633158	0.000144846	0.00125372	0.000380507	0.00159025	0.00576516	0.00328273	0.112131	0.248993	0.0131492	1.03004	0.950406	0.587572	0.011272	0.00618276	0.382882	0.011464	0.0239459	0.000702956	0.00872176	0.0031797	0	0.00106873
	S3	2018-02-06	72 h	154.267	38.5695	4.2764	2.35537	0.36961	0.203576	0.00958297	0.00527815	33	0.000561494	0.0157757	0.000115188	0.00260749	0.000788029	0.00177353	0.00511323	0.00437746	0.8375	1.92098	0.0119206	0.562485	0.520305	1.1035	0.0608869	0.0105757	0.748707	0.00430976	0.0105604	0.000183471	0.00721885	0.00488669	0.0058946	0.000861953
	S4	2018-02-13	72 h	154.841	22.0936	2.6124	1.20767	0.224953	0.103993	0.0101818	0.00470691	18	0.000320014	0.00116765	0.000299483	0.000698288	0.000404717	0.000476349	0.00215164	0.000553574	0.0246712	0.0447227	0.00729674	0.717991	0.213267	0.149585	0.00205173	0.00172874	0.0914765	0.00212656	0.00903311	0.000285501	0.00619108	0	0.000598721	0.000572683
	S5	2018-02-20	72 h	153.432	13.2697	3.445	1.74007	0.299373	0.151214	0.0225606	0.0113954	12	0.000118568	0.00400199	2.94838e-05	0.000909478	0.000403877	0.000883955	0.00100929	0.00211286	0.019087	0.0427618	0.00880053	0.392386	0.285692	0.131663	0.00202435	0.0016636	0.12454	0.00292202	0.00792737	0.000131127	0.00511717	0.000499769	0.000226255	0.000625917
	S6	2018-03-01	72 h	153.542	24.5861	4.1278	1.24027	0.358451	0.107703	0.0145794	0.00438066	23	0.000166304	0.00688339	3.70297e-05	0.000788586	0.000448143	0.000900351	0.001869	0.00276851	0.338513	0.699144	0.0091765	0.696235	0.338053	0.529466	0.0223864	0.00450483	0.30698	0.00182076	0.00685367	0.00043288	0.0152151	0.0010026	0.00462652	0.00101485
	S7	2018-03-06	72 h	154.648	19.2825	4.2398	1.58267	0.365544	0.136454	0.0189573	0.00707657	17	0.000113322	0.00630313	1.95216e-05	0.000791511	0.000729388	0.000977706	0.00112856	0.00205064	0.120105	0.26446	0.00776125	0.346025	0.277459	0.396196	0.00782966	0.00265752	0.181527	0.00293878	0.00722609	0.000235574	0.00876466	0.000367234	0.00263244	0.000995811
	S8	2018-03-13	72 h	154.841	22.0936	4.4279	1.86637	0.381286	0.160713	0.0172577	0.00727419	18	7.4641e-05	0.00578475	9.82254e-05	0.00083022	0.000691327	0.000787203	0.0016493	0.00175774	0.066981	0.147523	0.00940727	0.3698	0.329407	0.370717	0.0054863	0.00351016	0.21174	0.00483955	0.00919347	0.000313601	0.00696153	0.000689281	0.0012851	0.00103541
	S9	2018-03-20	72 h	155.553	13.9374	3.1784	1.19598	0.272439	0.102514	0.0195474	0.00735532	12	6.89339e-05	0.00253072	2.18262e-05	0.000809178	0.000838678	0.000586199	0.0011475	0.00110908	0.1082	0.223327	0.00910326	0.626988	0.175891	0.270688	0.0063768	0.00261427	0.126271	0.0011445	0.00734134	0.000480086	0.0092388	0	0.00191929	0.000532868
	S10	2018-03-27	72 h	154.247	23.1901	3.6493	2.18668	0.315451	0.189019	0.0136028	0.00815087	21	0.000480275	0.00883917	0.000129077	0.00206394	0.00119757	0.00158469	0.00504306	0.00345644	0.0590739	0.134634	0.011246	1.26689	0.41663	0.402311	0.00638766	0.00403405	0.257535	0.00618283	0.0155913	0.000438505	0.00573836	0.000764551	0.000665216	0.000887352
spring	S11	2018-05-08	48 h	101.822	20.9876	1.6486	1.31717	0.21588	0.172481	0.0102861	0.00821822	18	0.000454918	0.00909004	9.17013e-05	0.00219897	0.00132416	0.00172313	0.00275282	0.00373577	0.232963	0.560357	0.0487167	1.28245	0.311925	0.506099	0.0170855	0.00648786	0.334206	0.00639551	0.014361	0.000853812	0.00391465	0.00116597	0.000837534	0.0015931
	S12	2018-05-15	48 h	103.323	12.6593	3.8034	1.14127	0.49081	0.147276	0.0387706	0.0116338	12	0.000228835	0.0027545	1.44186e-05	0.000645623	0.00234678	0.000311019	0.00072569	0.00112366	0.0748979	0.173287	0.0229913	0.455618	0.195346	0.512812	0.00462554	0.00224114	0.129852	0.00269141	0.00611622	0.000253677	0.00371704	0.000395013	0.00128374	0
	S13	2018-05-22	48 h	103.86	27.1808	3.3756	2.17828	0.433353	0.279642	0.0159433	0.0102882	24	0	0.00886182	6.31376e-05	0.00212157	0.00136236	0.00289707	0.00408724	0.00771765	0.689759	1.46078	0.0424607	1.09175	0.37244	0.871604	0.0403809	0.00838758	0.540533	0.00451543	0.0155022	0.000381078	0.00364712	0.00105743	0.00344368	0.00151045
	S14	2018-05-26	48 h	103.295	30.1467	3.8136	1.7661	0.49226	0.227968	0.0163288	0.00756198	22	0.000486749	0.0059525	8.27828e-05	0.0012951	0.00189	0.00453871	0.00355777	0.0146069	0.370718	0.813894	0.0374478	2.07188	0.237766	1.43195	0.022774	0.00622041	0.332439	0.00388947	0.0139902	0.000971	0.0036149	0.000875415	0.00369237	0
	S15	2018-05-29	48 h	102.935	31.6705	4.3082	1.7873	0.558048	0.231512	0.0176204	0.00731002	26	0.000852743	0.00779702	0.000112959	0.00187627	0.00192948	0.00498753	0.00690202	0.0152466	0.324184	0.7517	0.0339747	2.31666	0.277496	1.10094	0.0211126	0.0091259	0.420421	0.0060477	0.0166727	0.000885813	0.00427859	0.00174165	0.00271889	0.00209295
	S16	2018-06-05	48 h	102.815	21.7867	1.6332	1.5385	0.211798	0.199517	0.00972143	0.00915774	21	0.000261089	0.0096506	4.4018e-05	0.00143	0.00443842	0.00201832	0.00173344	0.0064773	0.316143	0.677025	0.0218199	0.944654	0.281245	0.636978	0.021122	0.00665239	0.344291	0.00552421	0.0130554	0.000345664	0.00457338	0.00144513	0.0030985	0.00246919
	S17	2018-06-09	48 h	101.929	22.5353	3.2792	0.8948	0.428952	0.117049	0.0190347	0.00519402	20	0.000123059	0.00851666	6.73045e-05	0.00219898	0.00392752	0.00307114	0.00261183	0.00920119	0.476857	1.00275	0.019845	0.978173	0.29629	0.805568	0.0285791	0.00756302	0.389169	0.00586927	0.0102709	0.00040763	0.00369901	0.00206988	0.0023664	0.00178374
	S18	2018-06-13	48 h	101.586	15.5632	1.7672	0.848275	0.231948	0.111338	0.0149036	0.00715391	15	3.90119e-05	0.00687852	-2.07988e-05	0.000936004	0.00280995	0.00114502	0.000451739	0.00377549	0.201873	0.412774	0.0137283	0.722759	0.204766	0.539986	0.0120846	0.00437198	0.182542	0.00422497	0.00873238	0.000425507	0.00480836	0.000768134	0.00208933	0.000696946
	S19	2018-06-18	48 h	102.729	18.7094	2.4126	1.17007	0.313135	0.151866	0.0167367	0.00811707	16	0.000400191	0.00314309	5.0021e-05	0.00182334	0.00280642	0.00214408	0.00201623	0.00694446	0.105101	0.255287	0.0151616	1.4499	0.119462	0.467205	0.00811058	0.003823	0.16077	0.00306092	0.0144292	0.000645368	0.00456563	0	0.00136855	0.00144521
	S20	2018-06-20	48 h	102.932	19.8966	3.2078	1.32037	0.415524	0.171035	0.0208841	0.00859619	18	0.0248213	0.0296838	0.000258247	0.00822849	0.000115626	0.00197116	0.00265768	0.00197589	0.220407	0.536728	0.0237098	1.48398	0.205317	0.756449	0.0170678	0.00662707	0.313006	0.00534213	0.0265906	0.000766052	0.00437956	0.000307633	0.00155931	0
total	Mean				23.2064	3.30874	1.62318	0.348704	0.170163	0.0162587	0.00761225	19.75	0.0015	0.008	0.0003	0.0018	0.0015	0.0018	0.003	0.0047	0.24	0.52	0.019	1	0.3	0.6	0.016	0.005	0.29	0.005	0.013	0.0005	0.006	0.0011	0.0021	0.001
	SD				7.2013	1.01534	0.530625	0.107896	0.0502923	0.0069123	0.00199676	5.32002	0.0013	0.006	0.0001	0.0017	0.0012	0.0013	0.0021	0.0042	0.22	0.49	0.013	0.5	0.2	0.3	0.015	0.003	0.16	0.002	0.006	0.0002	0.003	0.0012	0.0015	0.0007
	Median				22.0936	3.4103	1.56059	0.361998	0.165874	0.0161361	0.0074165	19	0.0003	0.007	0.0002	0.0014	0.001	0.0017	0.0024	0.0034	0.16	0.34	0.013	0.9	0.3	0.5	0.012	0.004	0.28	0.004	0.012	0.0004	0.005	0.0008	0.0017	0.001
	Min				12.6593	1.6332	0.848275	0.164506	0.102514	0.00467349	0.00438066	12	0.0001	0.001	0.0001	0.0006	0.0001	0.0003	0.0005	0.0006	0.02	0.04	0.007	0.3	0.1	0.1	0.002	0.002	0.09	0.001	0.006	0.0001	0.004	0.0001	0.0001	0.0001
	Max				38.5695	5.0504	2.69757	0.558048	0.279642	0.0387706	0.0116338	33	0.0248	0.03	0.0005	0.0082	0.0044	0.005	0.0073	0.0152	0.84	1.92	0.049	2.3	1	1.4	0.061	0.011	0.75	0.012	0.027	0.001	0.015	0.0049	0.0059	0.0025
	25th percentiles				19.1392	2.56245	1.20475	0.262316	0.131603	0.0127736	0.00678694	16.75	0.0001	0.005	0.0001	0.0008	0.0006	0.0009	0.0015	0.0019	0.07	0.17	0.009	0.6	0.2	0.4	0.006	0.003	0.18	0.003	0.009	0.0003	0.004	0.0004	0.0011	0.0006
	75th percentiles				27.9223	4.1558	1.94435	0.429402	0.204761	0.0189766	0.00831271	23	0.0005	0.009	0.0002	0.0021	0.002	0.002	0.0043	0.0066	0.33	0.71	0.023	1.3	0.3	0.8	0.021	0.007	0.35	0.006	0.016	0.0007	0.007	0.0012	0.0028	0.0015
	Skewness				0.499251	-0.360639	0.473311	0.0807857	0.375	1.6346	0.390564	0.534662	4.46	2.55	1.17	3.18	1.16	1.32	0.84	1.55	1.47	1.55	1.23	1.07	2.32	0.85	1.79	0.48	1.27	1.28	1.09	0.71	1.94	2.07	0.93	0.24
winter	Mean				24.2991	3.69254	1.85014	0.318237	0.159358	0.0144943	0.00690138	20.3	0.000282761	0.00679151	0.000111891	0.00139635	0.000657069	0.00113351	0.00321573	0.00229544	0.174348	0.384566	0.00976464	0.689966	0.40537	0.465328	0.0129762	0.00413468	0.268276	0.00436651	0.0114255	0.000358974	0.0080284	0.00125293	0.00189783	0.000927327
	SD				8.36358	0.934378	0.549548	0.0802256	0.0468931	0.00535793	0.00203406	6.39531	0.000197905	0.00416643	9.33505e-05	0.000903753	0.000257679	0.000497262	0.00233009	0.00117196	0.250101	0.571525	0.00183313	0.301705	0.226297	0.289362	0.0178213	0.00263891	0.191097	0.00302411	0.00557394	0.00016697	0.00286465	0.00156489	0.00195867	0.000330851
	Median				22.6419	3.88855	1.80322	0.336951	0.155963	0.0142896	0.00717538	19.5	0.000243159	0.00631736	0.000106706	0.000869849	0.000689889	0.000939029	0.00201032	0.00208175	0.0875905	0.185425	0.00929188	0.661612	0.33373	0.399254	0.00638223	0.00369265	0.231419	0.00362427	0.00911329	0.000349818	0.00716781	0.000726916	0.00120764	0.000941582
	Min				13.2697	1.918	1.19598	0.164506	0.102514	0.00467349	0.00438066	12	6.89339e-05	0.00116765	1.95216e-05	0.000698288	0.000380507	0.000476349	0.00100929	0.000553574	0.019087	0.0427618	0.00729674	0.346025	0.175891	0.131663	0.00202435	0.0016636	0.0914765	0.0011445	0.00685367	0.000131127	0.00511717	0	0	0.000532868
	Max				38.5695	5.0504	2.69757	0.430752	0.230078	0.0225606	0.0113954	33	0.000561494	0.0157757	0.000299483	0.00321107	0.00119757	0.0017749	0.00728054	0.00437746	0.8375	1.92098	0.0131492	1.26689	0.950406	1.1035	0.0608869	0.0105757	0.748707	0.011464	0.0239459	0.000702956	0.0152151	0.00488669	0.0058946	0.00167769
	25th percentiles				19.9853	3.24505	1.32587	0.279172	0.114891	0.0110371	0.00543813	17.25	0.000114633	0.00444768	3.13703e-05	0.000795928	0.000415573	0.000811391	0.00127295	0.00155346	0.0576841	0.123	0.00887621	0.43491	0.279517	0.295695	0.00516649	0.00262508	0.140085	0.00232543	0.00748785	0.000248056	0.00638369	0.000400368	0.000615344	0.000684926
	75th percentiles				29.223	4.26725	2.3132	0.368594	0.199937	0.0185324	0.00744709	23	0.00045646	0.00835022	0.000140904	0.00186139	0.000773369	0.00158886	0.00509569	0.00315418	0.118112	0.260593	0.0108808	0.847613	0.494386	0.573046	0.0104114	0.00438713	0.294619	0.00564711	0.0143336	0.000437099	0.00875393	0.00110522	0.00245415	0.00103027
	Skewness				0.443695	-0.621895	0.148078	-0.690233	0.107517	-0.345717	1.0107	0.567857	0.316316	0.957598	0.949234	1.27237	0.844346	0.216701	0.664142	0.344769	2.52048	2.62082	0.620907	0.694376	1.7081	1.14363	2.61485	1.8127	1.99531	1.50783	1.49666	0.710147	1.93963	1.80364	1.2625	1.12697
spring	Mean				22.1136	2.92494	1.39621	0.379171	0.180968	0.018023	0.00832312	19.2	0.00276679	0.00923285	7.63791e-05	0.00227543	0.00229507	0.00248072	0.00274965	0.00708049	0.30129	0.664458	0.0279856	1.27978	0.250205	0.762959	0.0192943	0.00615004	0.314723	0.0047561	0.0139721	0.00059356	0.00411983	0.000982624	0.00224583	0.00115916
	SD				6.0726	0.987922	0.421823	0.126797	0.0536773	0.00807735	0.00177673	4.26354	0.00775325	0.00757558	7.45148e-05	0.00215932	0.00127578	0.00144121	0.00184569	0.00485648	0.182006	0.376805	0.0119255	0.577479	0.0722039	0.30859	0.010283	0.00211644	0.126766	0.00128046	0.00550687	0.000260976	0.000451051	0.000652798	0.000981329	0.000919926
	Median				21.3872	3.2435	1.31878	0.422238	0.171758	0.0165328	0.00816764	19	0.00033064	0.00815684	6.5221e-05	0.0018498	0.00213813	0.0020812	0.00263475	0.00671088	0.274553	0.618691	0.0233505	1.1871	0.257631	0.696713	0.019099	0.00655747	0.333322	0.00492878	0.0141756	0.000535437	0.00409662	0.000966421	0.00222787	0.00147783
	Min				12.6593	1.6332	0.848275	0.211798	0.111338	0.00972143	0.00519402	12	0	0.0027545	-2.07988e-05	0.000645623	0.000115626	0.000311019	0.000451739	0.00112366	0.0748979	0.173287	0.0137283	0.455618	0.119462	0.467205	0.00462554	0.00224114	0.129852	0.00269141	0.00611622	0.000253677	0.0036149	0	0.000837534	0
	Max				31.6705	4.3082	2.17828	0.558048	0.279642	0.0387706	0.0116338	26	0.0248213	0.0296838	0.000258247	0.00822849	0.00443842	0.00498753	0.00690202	0.0152466	0.689759	1.46078	0.0487167	2.31666	0.37244	1.43195	0.0403809	0.0091259	0.540533	0.00639551	0.0265906	0.000971	0.00480836	0.00206988	0.00369237	0.00246919
	25th percentiles				19.0062	1.92855	1.14847	0.252245	0.148423	0.0151636	0.00737301	16.5	0.000149503	0.006184	4.55187e-05	0.00132882	0.00149427	0.00178513	0.00180414	0.0037457	0.206506	0.443762	0.0203387	0.953034	0.204904	0.519606	0.0133304	0.00483408	0.215158	0.00397334	0.010967	0.000387716	0.00370352	0.000488293	0.00141624	0.000174237
	75th percentiles				26.0194	3.69645	1.7092	0.476446	0.220856	0.0186811	0.00901735	21.75	0.000478791	0.00903299	8.94717e-05	0.00217962	0.00280907	0.00302762	0.00335653	0.0088303	0.359085	0.798346	0.0365795	1.47546	0.292529	0.855095	0.022361	0.00733536	0.37795	0.005783	0.015234	0.000831872	0.00451912	0.00137534	0.0030036	0.00173608
	Skewness				0.213036	-0.250038	0.503289	-0.247304	0.482092	2.07517	0.266217	-0.0541924	3.15608	2.55698	1.63059	2.79385	0.152017	0.53106	1.16291	0.682162	0.999752	0.886651	0.574976	0.591979	-0.138965	1.26579	0.674312	-0.546413	0.0592935	-0.389862	1.12484	0.206024	0.222481	0.178619	0.115658	-0.234899

## Sheet: Table S2a
	Table S2a. Spearman correlation coefficients between PM10 mass concentration (PTFE filters), ascorbic acid (AA) and dithiothreitol (DTT) volume- and mass-normalized oxidative potential responses
	(OPV and OPm, respectively), and mass concentration of all analyzed chemical elements for the 10 winter samples. Correlation coefficients significant at a p-level < 0.01, 0.05, and 0.10 are in bold, in bold-
	italic, and in italic, respectively.
	PM10	OPVAA	OPVDTT	OPmAA	OPmDTT	As	Ba	Cd	Cr	Mo	Ni	Pb	V	Al	Si	P	S	K	Ca	Ti	Mn	Fe	Cu	Zn	Se	Br	Rb	Sr	Zr
PM10	1
OPVAA	0.33743	1
OPVDTT	0.674859	0.378049	1
OPmAA	-0.766157	0.192661	-0.461776	1
OPmDTT	-0.541313	0.100679	0.163603	0.57752	1
As	0.835711	-0.0723628	0.613511	-0.874169	-0.36039	1
Ba	0.743038	0.196931	0.676952	-0.524701	-0.24768	0.757576	1
Cd	0.463252	-0.226967	0.372874	-0.855358	-0.297794	0.69697	0.224242	1
Cr	0.564806	0.00313604	0.849868	-0.440391	0.152104	0.648485	0.721212	0.309091	1
Mo	0.019245	-0.0414425	0.140267	-0.0799412	0.210545	-0.030303	0.272727	-0.29697	0.2	1
Ni	0.688272	0.193255	0.846642	-0.495387	-0.0126623	0.757576	0.915152	0.260606	0.806061	0.0787879	1
Pb	0.868114	0.00914634	0.698171	-0.917435	-0.409007	0.830303	0.648485	0.818182	0.587879	-0.0545455	0.672727	1
V	0.598171	0.606707	0.567073	-0.103976	0.0849477	0.515152	0.69697	-0.0424242	0.478788	0.127273	0.612121	0.260606	1
Al	0.444444	0.564428	0.0858912	0.0153847	-0.446346	0.0787879	0.466667	-0.333333	-0.030303	0.284848	0.333333	0.127273	0.50303	1
Si	0.478537	0.628049	0.125	0.00917435	-0.412154	0.0787879	0.466667	-0.333333	-0.030303	0.284848	0.333333	0.127273	0.50303	1	1
P	0.706797	0.351237	0.849868	-0.371187	0.110033	0.6	0.745455	0.357576	0.769697	0.115152	0.733333	0.721212	0.684848	0.369697	0.369697	1
S	0.570988	-0.18712	0.404916	-0.633849	-0.139285	0.587879	0.29697	0.721212	0.321212	-0.0787879	0.321212	0.733333	0.163636	-0.2	-0.2	0.478788	1
K	0.781271	0.397716	0.965881	-0.500251	0.0293161	0.757576	0.818182	0.50303	0.745455	-0.187879	0.866667	0.793939	0.636364	0.236364	0.236364	0.878788	0.50303	1
Ca	0.875793	0.358052	0.725364	-0.585165	-0.436385	0.721212	0.915152	0.321212	0.612121	0.151515	0.878788	0.781818	0.563636	0.612121	0.612121	0.781818	0.345455	0.830303	1
Ti	0.62037	0.576698	0.263809	-0.129231	-0.383034	0.284848	0.6	-0.163636	0.10303	0.272727	0.466667	0.29697	0.684848	0.951515	0.951515	0.539394	0.0545455	0.418182	0.709091	1
Mn	0.887889	0.572824	0.650233	-0.444134	-0.38024	0.624242	0.830303	0.272727	0.478788	0.139394	0.721212	0.69697	0.733333	0.709091	0.709091	0.854545	0.369697	0.806061	0.915152	0.842424	1
Fe	0.880771	0.553194	0.686933	-0.426837	-0.294846	0.6	0.854545	0.187879	0.539394	0.127273	0.757576	0.636364	0.793939	0.69697	0.69697	0.878788	0.321212	0.830303	0.90303	0.830303	0.987879	1
Cu	0.561728	0.383443	0.941736	-0.436925	0.291233	0.551515	0.551515	0.490909	0.709091	-0.0424242	0.684848	0.624242	0.466667	-0.0424242	-0.0424242	0.733333	0.418182	0.793939	0.527273	0.139394	0.515152	0.527273	1
Zn	0.652186	0.104946	0.84883	-0.702817	0.0700765	0.660606	0.442424	0.733333	0.769697	-0.0909091	0.587879	0.793939	0.272727	-0.2	-0.2	0.745455	0.6	0.745455	0.490909	-0.0181818	0.442424	0.430303	0.866667	1
Se	0.280386	-0.00619269	0.157914	-0.211196	-0.102249	-0.0424242	0.0545455	0.2	0.0424242	0.0909091	0.0666667	0.393939	-0.00606061	0.151515	0.151515	0.430303	0.660606	0.248485	0.236364	0.260606	0.345455	0.309091	0.224242	0.284848	1
Br	0.229601	0.381369	-0.0906533	0.119151	-0.422589	-0.236364	0.127273	-0.393939	-0.29697	0.115152	0.0787879	0.00606061	-0.00606061	0.781818	0.781818	0.0545455	-0.127273	-0.030303	0.369697	0.660606	0.369697	0.345455	-0.345455	-0.406061	0.406061	1
Rb	0.901857	0.408537	0.841463	-0.535171	-0.257989	0.741645	0.875384	0.358664	0.70517	-0.103344	0.851068	0.717329	0.729487	0.443771	0.443771	0.875384	0.334348	0.948333	0.887542	0.583589	0.887542	0.917937	0.626143	0.589668	0.121581	0.103344	1
Sr	0.165145	0.12766	-0.237083	0.00609767	-0.526959	-0.0545455	0.369697	-0.454545	-0.10303	0.575758	0.115152	-0.115152	0.151515	0.733333	0.733333	-0.0181818	-0.454545	-0.127273	0.369697	0.587879	0.333333	0.321212	-0.393939	-0.490909	-0.2	0.6	0.12766	1
Zr	0.585695	0.362273	0.665714	-0.413075	-0.21089	0.29697	0.551515	0.284848	0.393939	-0.272727	0.624242	0.515152	0.212121	0.175758	0.175758	0.527273	0.2	0.745455	0.612121	0.224242	0.527273	0.539394	0.672727	0.454545	0.272727	0.151515	0.632222	-0.0666667	1

## Sheet: Table S2b
	Table S2b. Spearman correlation coefficients between PM10 mass concentration (PTFE filters), ascorbic acid (AA) and dithiothreitol (DTT) volume- and mass-normalized oxidative potential responses
	(OPV and OPm, respectively), and mass concentration of all analyzed chemical elements for the 10 spring samples. Correlation coefficients significant at a p-level < 0.01, 0.05, and 0.10 are in bold, in bold-
	italic, and in italic, respectively.
	PM10	OPVAA	OPVDTT	OPmAA	OPmDTT	As	Ba	Cd	Cr	Mo	Ni	Pb	V	Al	Si	P	S	K	Ca	Ti	Mn	Fe	Cu	Zn	Se	Br	Rb	Sr	Zr
PM10	1
OPVAA	0.342509	1
OPVDTT	0.822101	0.307694	1
OPmAA	-0.198778	0.668712	-0.203078	1
OPmDTT	-0.145528	-0.0310583	0.367617	0.121127	1
As	0.217126	0.159509	0.326155	0.174847	-0.0279525	1
Ba	0.370399	-0.399398	0.254663	-0.204343	0.0626962	0.2	1
Cd	0.358261	0.22678	0.31497	0.296558	-0.123639	0.757576	0.478788	1
Cr	0.32622	-0.131499	0.168715	0.0886854	-0.167203	0.284848	0.709091	0.745455	1
Mo	-0.165138	-0.230061	-0.45231	-0.131902	-0.29816	-0.478788	-0.272727	-0.684848	-0.430303	1
Ni	0.838415	0.525996	0.542955	0.0886854	-0.421103	0.248485	0.0181818	0.490909	0.29697	0.00606061	1
Pb	0.826752	0.481716	0.79514	0	-0.0802607	0.406061	0.260606	0.781818	0.50303	-0.612121	0.733333	1
V	0.790277	0.451228	0.440386	-0.10366	-0.543303	0.0545455	-0.127273	0.272727	0.10303	0.175758	0.951515	0.612121	1
Al	0.847561	0.19572	0.579766	-0.241591	-0.198166	-0.139394	0.381818	0.381818	0.430303	-0.0787879	0.745455	0.684848	0.721212	1
Si	0.863226	0.250005	0.587181	-0.207321	-0.228434	-0.139394	0.381818	0.381818	0.430303	-0.0787879	0.745455	0.684848	0.721212	1	1
P	0.528878	0.256102	0.764558	-0.15854	0.327217	0.321212	0.321212	0.612121	0.321212	-0.769697	0.236364	0.781818	0.115152	0.454545	0.454545	1
S	0.589668	0.36586	0.550482	0.0731721	-0.259304	0.769697	0.139394	0.830303	0.430303	-0.539394	0.69697	0.793939	0.551515	0.321212	0.321212	0.454545	1
K	0.661446	0.00325231	0.499137	-0.30897	0	-0.2	0.624242	0.345455	0.527273	-0.187879	0.345455	0.563636	0.321212	0.818182	0.818182	0.612121	0.0787879	1
Ca	0.868354	0.605922	0.715419	0.135701	-0.115031	0.151515	0.151515	0.430303	0.151515	-0.163636	0.745455	0.648485	0.69697	0.781818	0.781818	0.369697	0.466667	0.406061	1
Ti	0.850157	0.214724	0.581541	-0.196319	-0.183244	-0.187879	0.430303	0.309091	0.406061	-0.0181818	0.684848	0.6	0.660606	0.987879	0.987879	0.418182	0.236364	0.830303	0.733333	1
Mn	0.855421	0.250005	0.538702	0.0185189	-0.26563	0.0545455	0.612121	0.515152	0.6	-0.0909091	0.648485	0.672727	0.575758	0.806061	0.806061	0.369697	0.369697	0.757576	0.648485	0.769697	1
Fe	0.905488	0.180429	0.631914	-0.244649	-0.210552	-0.10303	0.527273	0.406061	0.50303	-0.0666667	0.660606	0.69697	0.636364	0.90303	0.90303	0.466667	0.29697	0.878788	0.636364	0.878788	0.951515	1
Cu	0.589032	-0.184239	0.280397	-0.317654	-0.347355	0.248485	0.709091	0.575758	0.660606	-0.127273	0.284848	0.454545	0.236364	0.478788	0.478788	0.369697	0.284848	0.721212	0.2	0.454545	0.733333	0.69697	1
Zn	0.596949	0.179016	0.662542	0.0555566	0.0625012	0.575758	0.466667	0.769697	0.648485	-0.648485	0.454545	0.733333	0.260606	0.272727	0.272727	0.466667	0.806061	0.212121	0.284848	0.212121	0.515152	0.393939	0.345455	1
Se	0.374658	0.270207	0.358271	-0.0869632	-0.377358	0.721212	0.030303	0.709091	0.260606	-0.50303	0.478788	0.6	0.430303	0.175758	0.175758	0.381818	0.866667	0.00606061	0.333333	0.0909091	0.127273	0.10303	0.29697	0.527273	1
Br	-0.342922	-0.649726	-0.38337	-0.45863	-0.116091	0.0545455	0.163636	-0.321212	-0.151515	0.381818	-0.430303	-0.575758	-0.357576	-0.587879	-0.587879	-0.624242	-0.224242	-0.430303	-0.539394	-0.551515	-0.2	-0.345455	0.0424242	-0.030303	-0.139394	1
Rb	0.632222	0.0914651	0.244659	-0.2622	-0.444521	-0.127273	0.345455	0.212121	0.272727	0.284848	0.490909	0.369697	0.539394	0.709091	0.709091	0.236364	0.030303	0.757576	0.466667	0.69697	0.745455	0.806061	0.757576	-0.0787879	0.0181818	-0.248485	1
Sr	0.778119	0.292688	0.611647	-0.213419	-0.0679129	-0.115152	0.115152	0.0545455	-0.0787879	0.151515	0.69697	0.418182	0.721212	0.757576	0.757576	0.151515	0.260606	0.369697	0.842424	0.769697	0.539394	0.6	0.0181818	0.139394	0.10303	-0.333333	0.393939	1
Zr	0.504637	-0.265437	0.185759	-0.419761	-0.350007	-0.128844	0.398803	0.0552189	0.276094	0.435616	0.374261	0.202469	0.423345	0.435616	0.435616	0.00613543	0.00613543	0.582866	0.0674897	0.447886	0.668762	0.693304	0.717845	0.0920315	-0.116573	0.202469	0.791471	0.202469	1
